# Supplementary material for: Involvement of NO in V-ATPase Regulation in Cucumber Roots under Control and Cadmium Stress Conditions
Source: MDPI journal article supplement (doi:10.3390/plants12152884), 2023-08-07
Supplement: s1 [file s1]

Supplementary material

## **Involvement of NO in V-ATPase regulation in cucumber roots under control and cadmium stress conditions**

**Magdalena Zboińska<sup>1</sup>, Anna Janeczko<sup>2</sup> and Katarzyna Kabala<sup>1,\*</sup>**

<sup>1</sup>Department of Plant Molecular Physiology, Faculty of Biological Sciences, University of Wrocław, Kanonia 6/8, 50-328 Wrocław, Poland; [magdalena.zboinska@uwr.edu.pl](mailto:magdalena.zboinska@uwr.edu.pl) (M.Z.); [katarzyna.kabala@uwr.edu.pl](mailto:katarzyna.kabala@uwr.edu.pl) (K.K.)

<sup>2</sup>The Franciszek Górski Institute of Plant Physiology, Polish Academy of Sciences, Niezapominajek 21, 30-239 Krakow, Poland; [a.janeczko@ifr-pan.edu.pl](mailto:a.janeczko@ifr-pan.edu.pl) (A.J.)

\* Correspondence: [katarzyna.kabala@uwr.edu.pl](mailto:katarzyna.kabala@uwr.edu.pl)

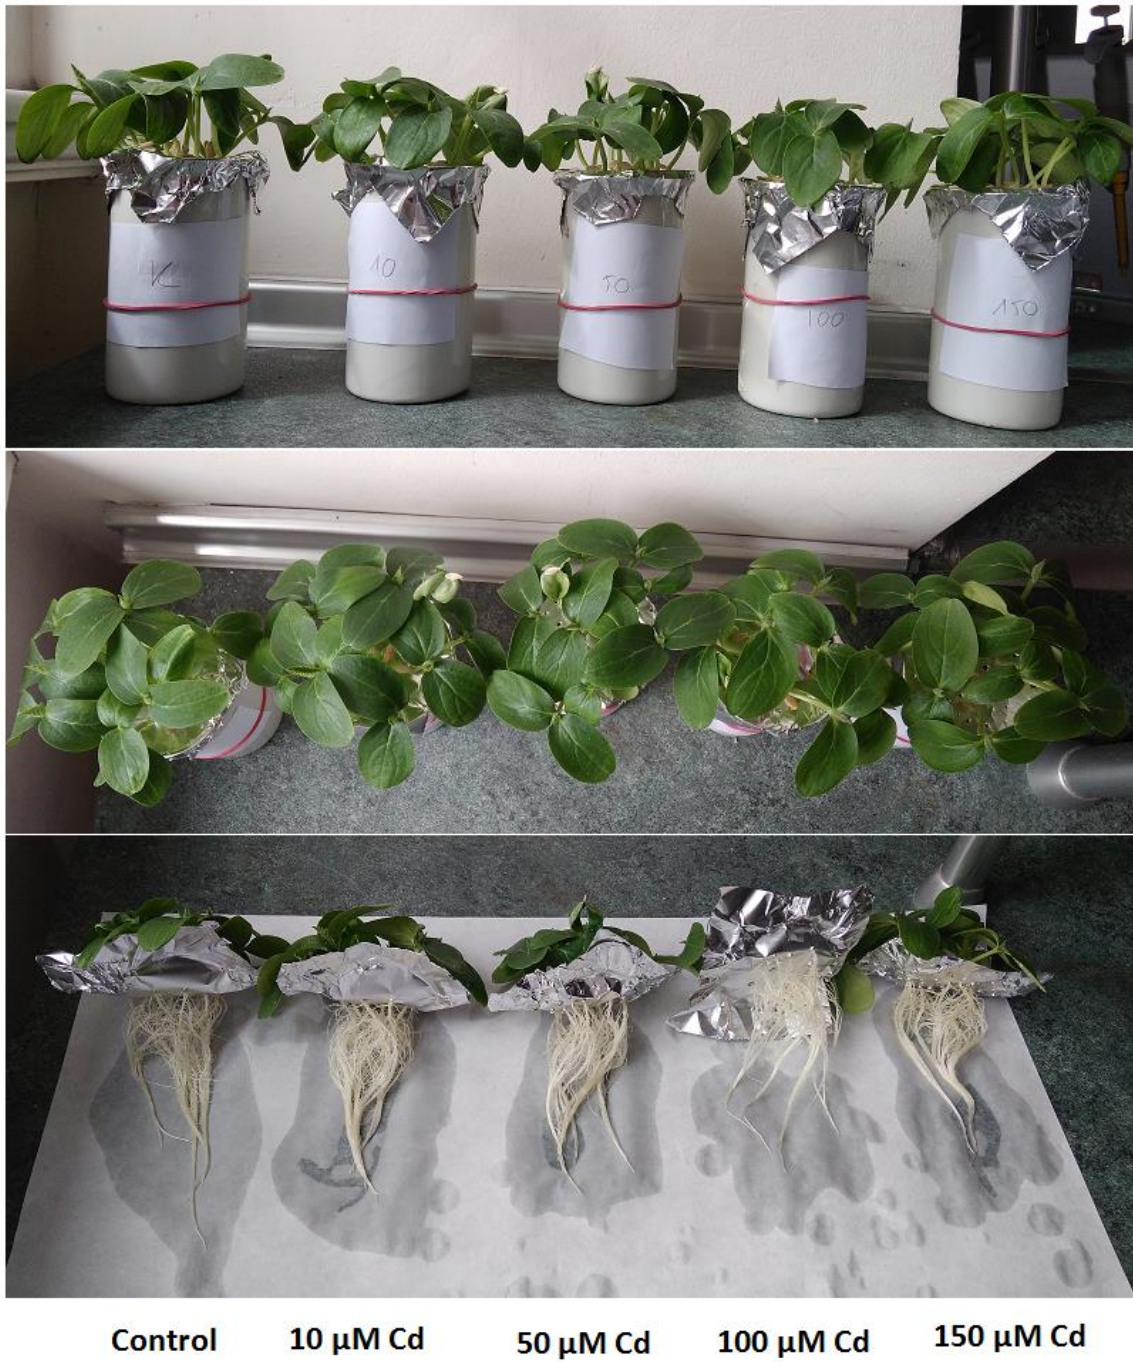

**Figure S1.** Images of cucumber seedlings treated with different concentrations of  $\text{CdCl}_2$  for 24 h. No visually significant changes in the phenotype were observed.

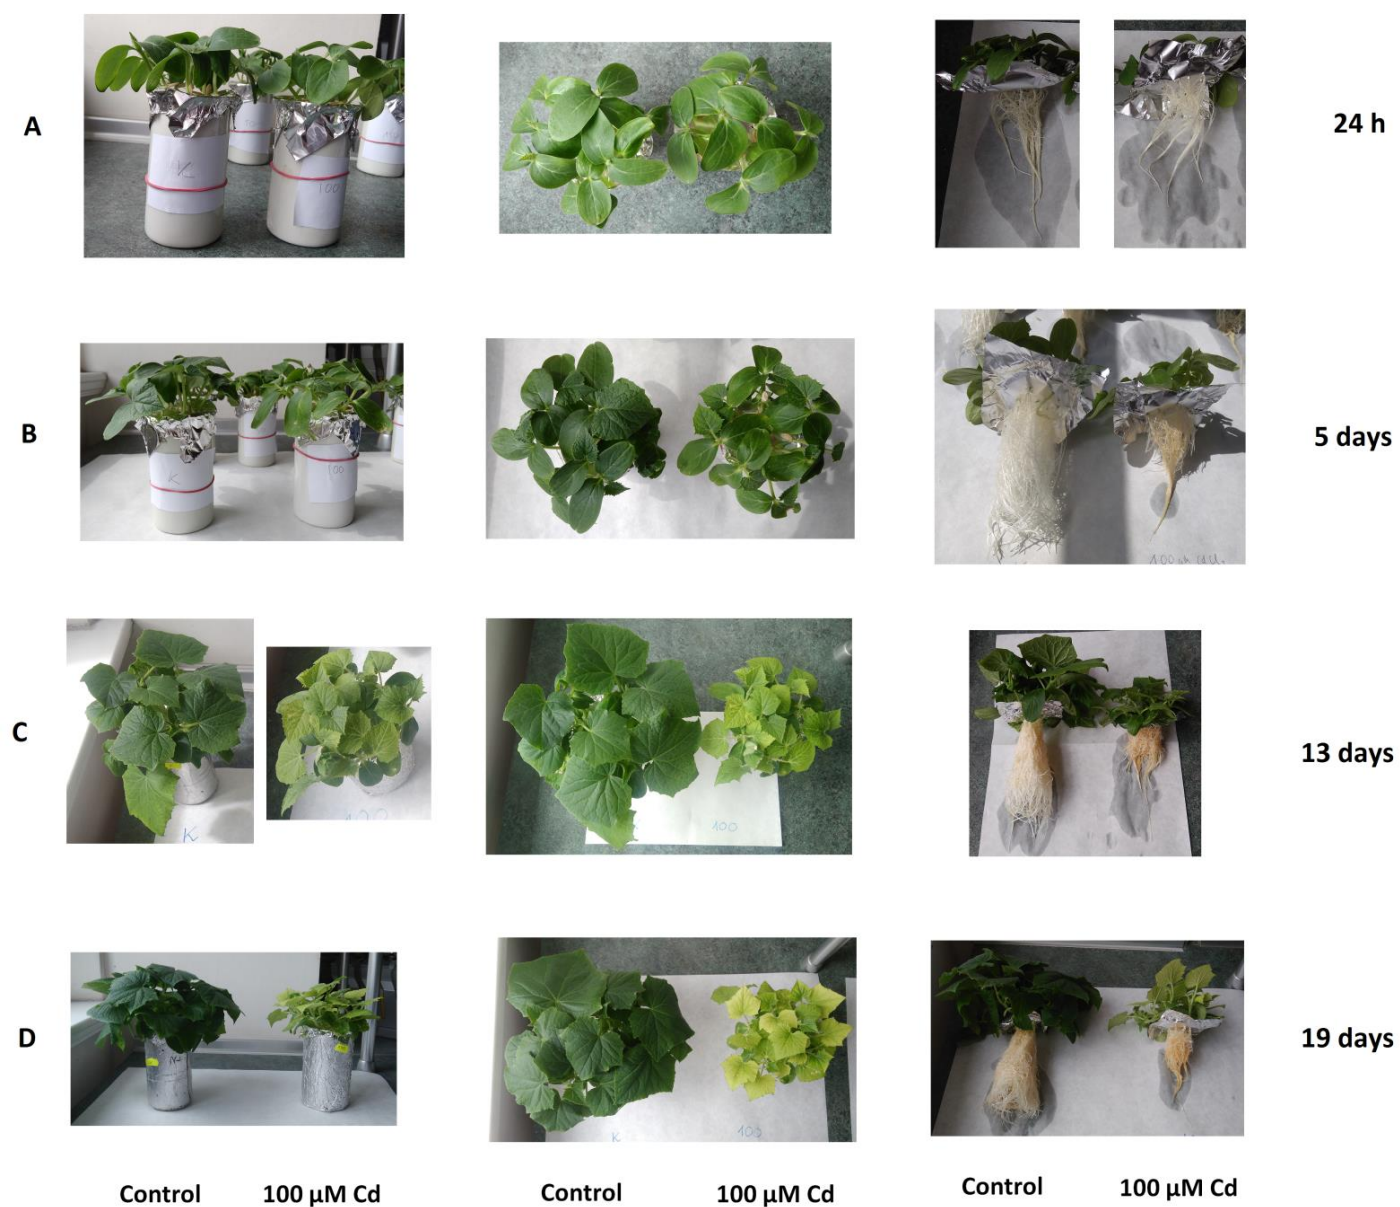

**Figure S2.** Effect of longer treatment of cucumber seedlings with 100  $\mu$ M CdCl<sub>2</sub> on their phenotype.

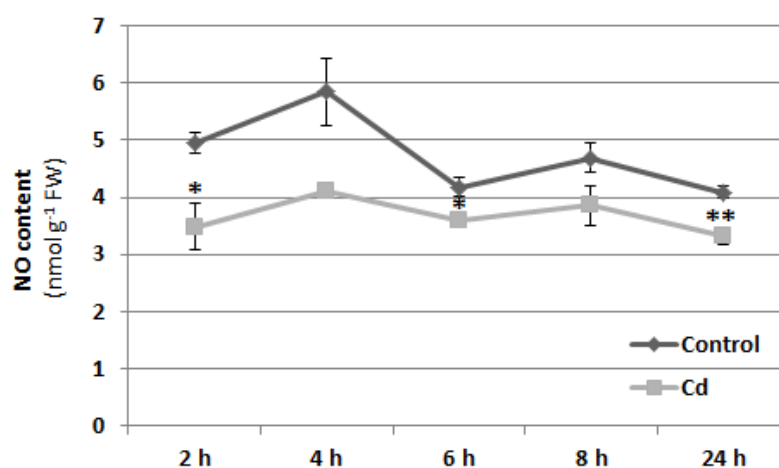

**Figure S3.** Changes in NO content over time in cucumber roots treated with 100  $\mu$ M CdCl<sub>2</sub>. Data represent the means of 3 biological repetitions  $\pm$  SE. Statistically significant differences (independent-sample t-test) between the control and Cd treatment are marked as \* ( $0.01 \leq p < 0.05$ ) or \*\* ( $p < 0.01$ ).

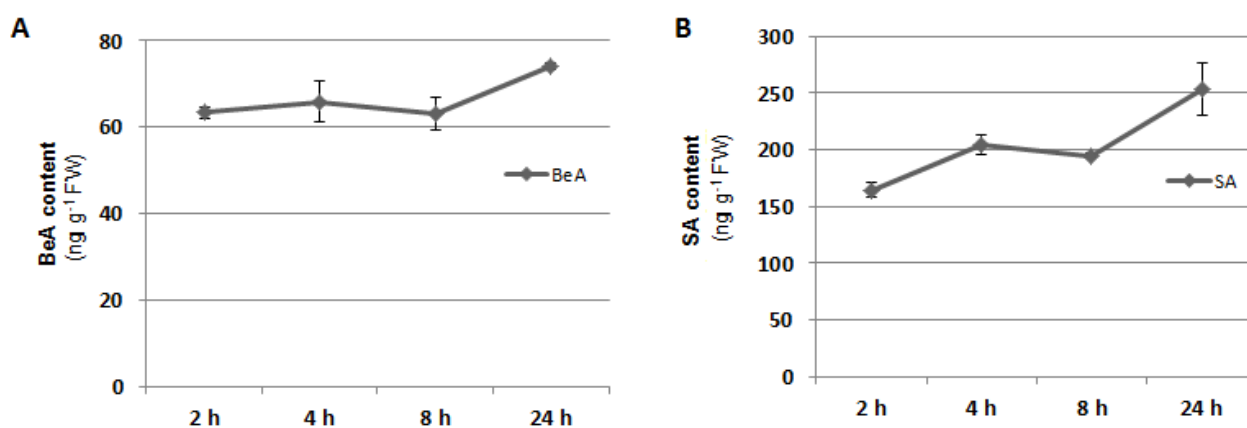

**Figure S4.** Changes in BeA (A) and SA (B) levels over time in cucumber roots treated with 100  $\mu$ M CdCl<sub>2</sub>. Data represent the means of 5 biological repetitions  $\pm$  SE.
